# Supplementary figures and images for: Caffeine improves bladder function in diabetic rats via a neuroprotective effect
Source: PubMed Central journal article supplement — Exp Ther Med. 2021 Mar 17;21(5):501. doi: 10.3892/etm.2021.9932 (PMC8005692; doi:10.3892/etm.2021.9932), 2021-03-17

Figure S1. Hematoxylin an eosin staining of the dorsal root ganglion tissue (magnification, x400).

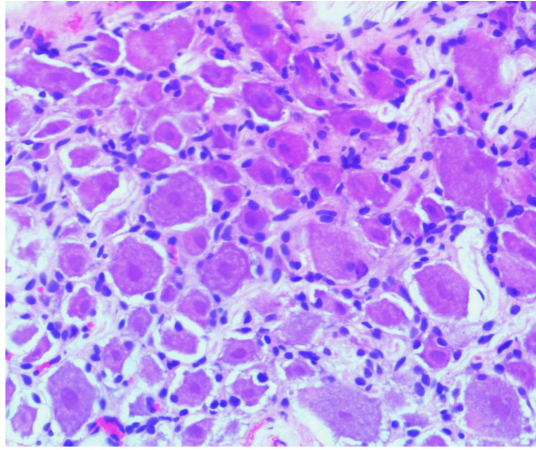

Supplement: Supplementary_Data.pdf [file Supplementary_Data.pdf]
